# Supplementary material for: B Vitamins and Incidence of Advanced Age-Related Macular Degeneration: The Alienor Study
Source: MDPI journal article supplement (doi:10.3390/nu14142821), 2022-07-08
Supplement: s1 [file s1]

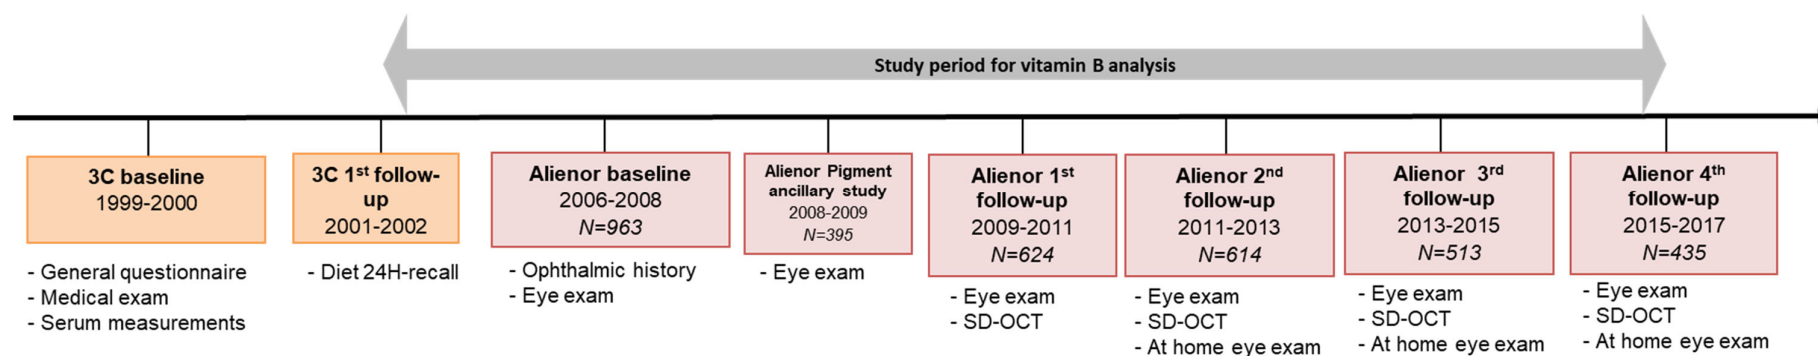

**Figure S1. Alienor study timeline.**

AMD: age-related macular degeneration; SD-OCT: spectral domain optical coherence tomography.

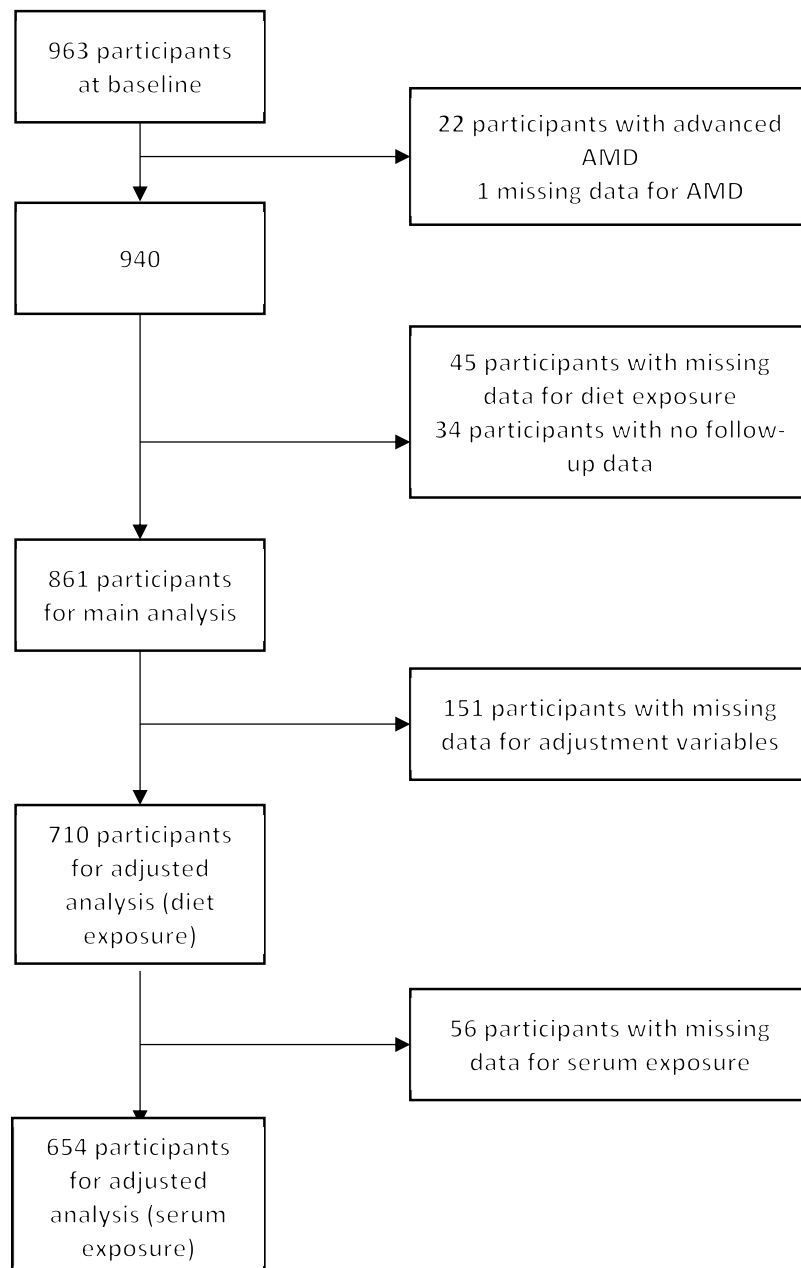

**Figure S2. Flow chart describing the sample selection from the Alienor Study 2001-2017.**

AMD: age-related macular degeneration;

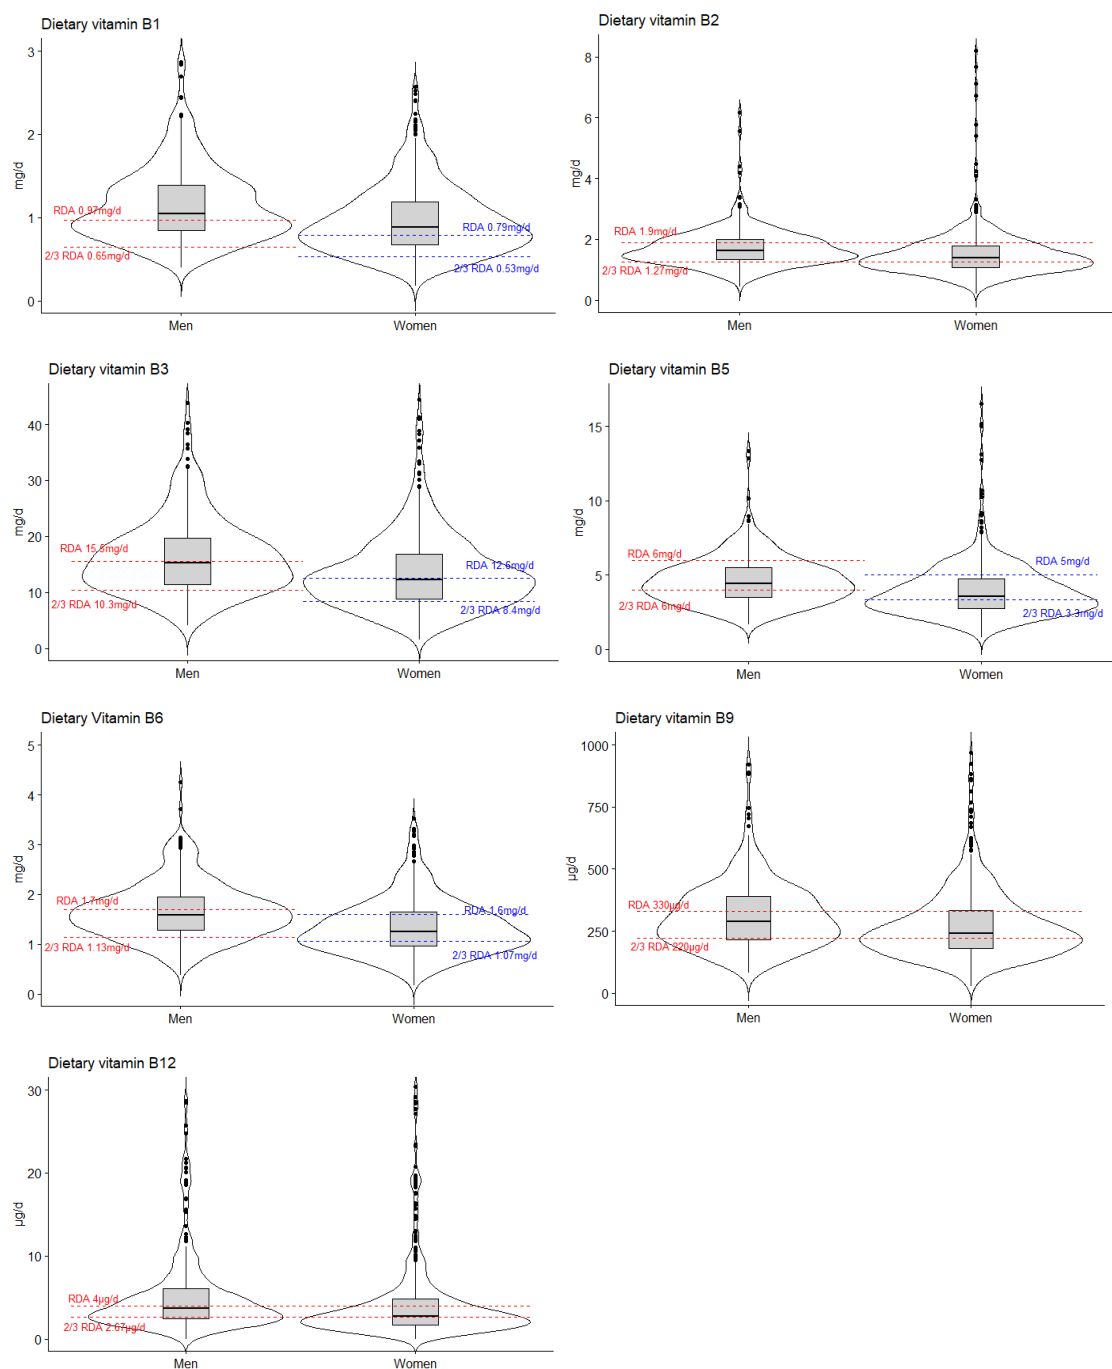

**Figure S3: Description of dietary intake of B vitamins at inclusion among participants of the Alienor Study (2001, N=861). Violin plots by gender.**

RDA: Recommended dietary allowance for the French population.

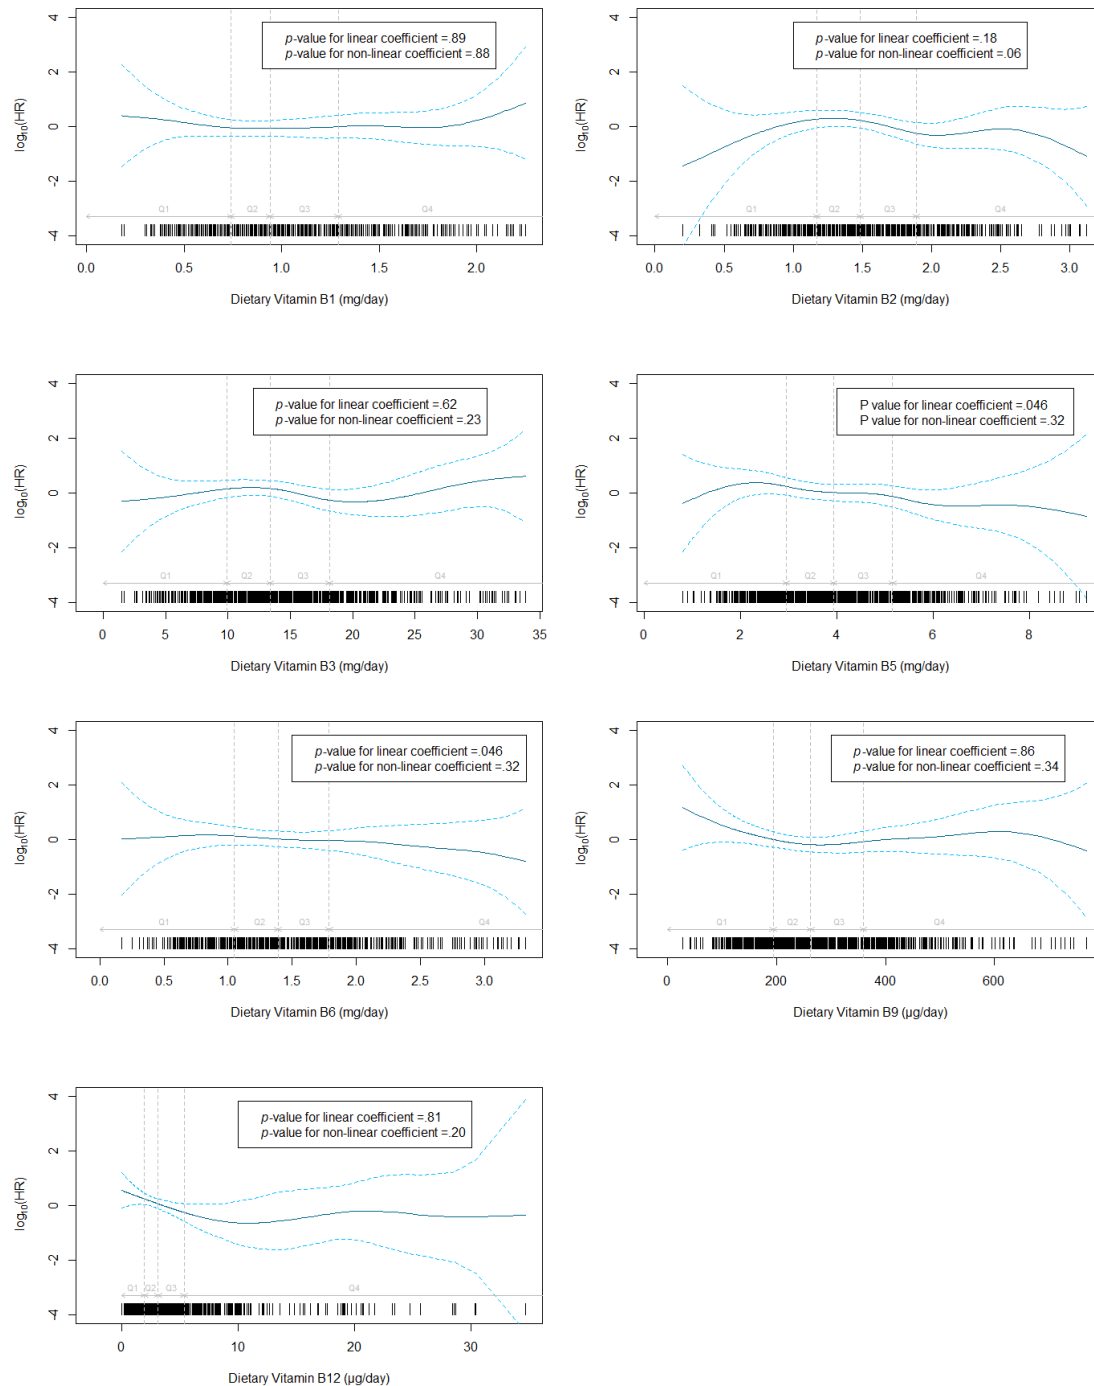

**Figure S4: Dose-response relationships between dietary B vitamins and hazard ratios for advanced AMD estimated by penalized splines (4 ddl) in Cox proportional hazard models, Alienor Study, 2001-2017.**

$p$ -value for linear coefficient is the  $p$ -value for the test of a linear association against a null association.  $p$ -value for non-linear coefficient is the  $p$ -value for the test of a non-linear association against a linear association. Vertical dashed lines indicate quintiles of distribution for B vitamins.

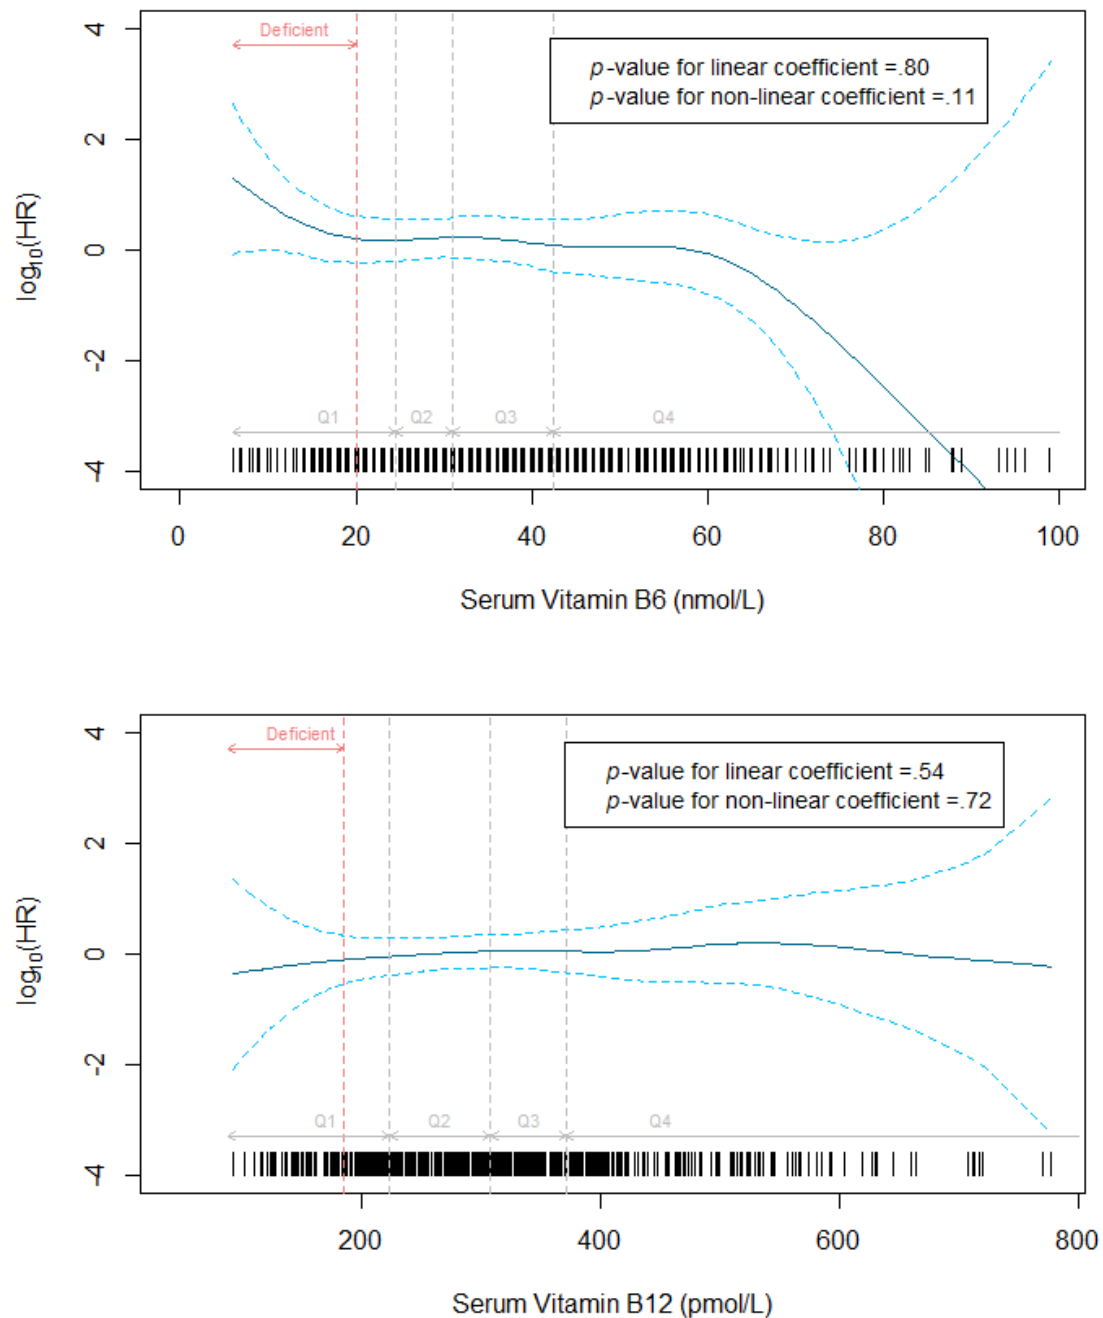

**Figure S5: Dose-response relationships between serum vitamins B6 and B12 and hazard ratios for advanced AMD estimated by penalized splines (4 ddl) in Cox proportional hazard models, Alienor Study, 2001-2017.**

$p$ -value for linear coefficient is the  $p$ -value for the test of a linear association against a null association.  $p$ -value for non-linear coefficient is the  $p$ -value for the test of a non-linear association against a linear association. Vertical dashed lines indicate quintiles of distribution for B vitamins.

**Table S1. Comparison between included and excluded participants. Alienor Study (N=963, 2001-2017).**

| Characteristics                               | Participants, No (%) |                  | P-Value <sup>a</sup> |
|-----------------------------------------------|----------------------|------------------|----------------------|
|                                               | Included (n=861)     | Excluded (n=102) |                      |
| Female, sex                                   | 530 (61.6)           | 66 (64.7)        | 0.54                 |
| Age, mean (SD), y                             | 74.7 (4.3)           | 78.9 (3.8)       | <0.001               |
| Missing data                                  | 0                    | 50               |                      |
| Smoking status, pack-years                    |                      |                  | 0.64                 |
| Never smoker                                  | 549 (64.4)           | 65 (65.7)        |                      |
| <20                                           | 153 (18.0)           | 20 (20.2)        |                      |
| ≥20                                           | 150 (17.6)           | 14 (14.1)        |                      |
| Missing data                                  | 9                    | 3                |                      |
| Physical activity                             |                      |                  | <0.001               |
| None                                          | 459 (53.3)           | 46 (45.1)        |                      |
| Medium                                        | 173 (20.1)           | 17 (16.7)        |                      |
| High                                          | 87 (10.1)            | 3 (2.9)          |                      |
| No answer                                     | 142 (16.5)           | 36 (35.3)        |                      |
| Alcohol consumption, mean (SD), g/day         | 12.0 (14.5)          | 10.3 (12.0)      | 0.23                 |
| Missing data                                  | 10                   | 12               |                      |
| Use of AMD supplement                         | 98 (11.4)            | 13 (12.7)        | 0.68                 |
| Body mass index, mean (SD), kg/m <sup>2</sup> | 26.4 (3.9)           | 26.3 (3.8)       | 0.84                 |
| Missing data                                  | 5                    | 3                |                      |
| HDL-Cholesterol, mean (SD), mg/dL             | 61.9 (15.6)          | 64.7 (16.0)      | 0.66                 |
| Missing data                                  | 46                   | 16               |                      |
| Genetic risk score, mean (SD)                 | 0.28 (1.19)          | 0.67 (1.25)      | 0.01                 |
| Missing data                                  | 141                  | 25               |                      |

Abbreviations: AMD, age-related macular degeneration; HDL, high-density lipoprotein

SI conversion factors: To convert HDL-cholesterol to mmol/L, multiply by 0.0259

<sup>a</sup> p value were obtained by using Chi<sup>2</sup> analyses for categorical data and *t* test for continuous variables.
